1 **Integrated single-nucleus and spatial transcriptomics**  
2 **captures transitional states in soybean nodule symbiosis**  
3 **establishment**

4  
5 Zhijian Liu<sup>1,2,3†</sup>, Xiangying Kong<sup>4,5†</sup>, Yanping Long<sup>1,2,3†</sup>, Hong Zhang<sup>1,2,3</sup>, Jinbu  
6 Jia<sup>1,2,3</sup>, Lijuan Qiu<sup>6</sup>, Jixian Zhai<sup>1,2,3\*</sup>, and Zhe Yan<sup>4,6\*</sup>

7  
8 **Affiliations:**

9 <sup>1</sup> Department of Biology, School of Life Sciences, Southern University of Science and  
10 Technology, Shenzhen 518055, China;

11 <sup>2</sup> Institute of Plant and Food Science, Southern University of Science and Technology, Shenzhen  
12 518055, China;

13 <sup>3</sup> Key Laboratory of Molecular Design for Plant Cell Factory of Guangdong Higher Education  
14 Institutes, Southern University of Science and Technology, Shenzhen 518055, China;

15 <sup>4</sup> Northeast Institute of Geography and Agroecology, Chinese Academy of Sciences, Changchun  
16 130102, China

17 <sup>5</sup> University of Chinese Academy of Sciences, Beijing 100049, China

18 <sup>6</sup> The National Key Facility for Crop Gene Resources and Genetic Improvement (NFCRI),  
19 Institute of Crop Science, Chinese Academy of Agricultural Sciences, Beijing, P.R. China

20  
21 † These authors contributed equally to this work.

22 \* Correspondence: [zhaijx@sustech.edu.cn](mailto:zhaijx@sustech.edu.cn) (J.Z.), [yanzhe@caas.cn](mailto:yanzhe@caas.cn) (Z.Y)

23

## 24 **Abstract**

25 Legumes form symbiosis with rhizobium leading to the development of nitrogen-fixing nodules.  
26 By integrating single-nucleus and spatial transcriptomics, we established a cell atlas of soybean  
27 nodules and roots. In central infected zone of nodule, we found that uninfected cells specialize into  
28 functionally distinct sub-groups during nodule development and revealed a transitional subtype of  
29 infected cells with enriched nodulation-related genes. Overall, our results provide a single-cell  
30 perspective for understanding rhizobium-legume symbiosis.

31

## 32 **Main**

33 On compatible host plants, the rhizobium bacteria infect and form symbiotic organ-nodules in the  
34 root, establishing nitrogen-fixing nodules which can convert atmospheric nitrogen into organic  
35 ammonia for host plant development. Despite remarkable progress by molecular genetics have  
36 established the framework of the nodulation and symbiotic nitrogen fixation (SNF)<sup>1</sup>, our  
37 understanding of cellular heterogeneity and developmental lineage of nodule is still limited.

38

39 To reveal the cell-type specific dynamic gene expression during nodule development in soybean,  
40 we established three single-nucleus libraries with two different developmental stages of nodules  
41 (at 12 days post-infection (dpi) and 21 dpi) and the corresponding region of roots where the nodules  
42 were formed at 21 dpi as control ([Fig.1a](#)). We obtained a total of 26712 high quality single-nucleus  
43 transcriptomes in the three libraries, which covering 39337 genes, with median genes/nucleus at  
44 1342 and median UMIs/nucleus at 1636 ([Supplementary Data 1](#)). After integration of the three  
45 datasets using scVI<sup>2</sup>, we obtained 15 cell clusters ([Fig.1b-c](#)) and a series of up-regulated genes for  
46 each cluster ([Supplementary Fig.1, Supplementary Data 2](#)). With known soybean marker genes,

47 orthologs of marker genes in Arabidopsis as well as public Arabidopsis scRNA-seq dataset<sup>3</sup>, we  
48 successfully identified root epidermis (cluster 5), root vascular bundle (cluster 3), nodule vascular  
49 bundle (cluster 9), nodule cortex (cluster 1) and infected cells (ICs) in nodule central infected zone  
50 (CIZ) (cluster 12) ([Supplementary Fig.2-4](#), [Supplementary Data 3](#)). However, due to the scarcity  
51 of marker genes in soybean nodule, there are still many cell clusters cannot be successfully  
52 assigned, especially those dominated by nodules ([Supplementary Fig.4b](#)). To overcome this  
53 problem, we used stereo-seq<sup>4</sup> to track the spatial expression of genes of the same developmental  
54 stage nodules ([Fig.1a](#), [Supplementary Fig.5](#)). By performing a deconvolution-based approach on  
55 these spatial transcriptomes, we validated the cluster identities which we detected above and  
56 further assigned cluster 0 (in CIZ), 2 (outer cortex), 4 (outer cortex), 7 (in CIZ) and 11 (in CIZ)  
57 based on their distribution over space ([Fig.1c-d](#)). To validate our final annotation, we performed  
58 GUS staining and RNA *in situ* hybridization with four genes specific expressed in CIZ, vascular  
59 bundle and inner cortex, and observed corresponding cell-type specific signals in nodules ([Fig.1e](#),  
60 [Supplementary Fig.6](#)). In summary, here we successfully classified the major cell types of both  
61 root and nodules.

62  
63 There are four clusters 0, 7, 11 and 12 co-localized in CIZ of nodule ([Fig.1d](#)). By examining the  
64 expression of orthologs which are up-regulated in *Lotus japonicus* uninfected cells (UCs) and  
65 infected cells (ICs)<sup>5</sup>, we identified cluster 0, 7, 11 as UC and further confirmed cluster 12 as ICs  
66 ([Fig.2a](#), [Supplementary Fig.7](#), [Supplementary Data 4](#)). In UCs, cluster 0 is shared by nodules at  
67 two different developmental stages, while two clusters (7, 11) are almost only found in 21-dpi  
68 nodule cells ([Fig.2b](#)). To reveal the differentiation trajectory of UC cells, we performed pseudo-  
69 time analysis and found that cluster 7 and 11 are developed from cluster 0, indicating

70 differentiation of functions of UC cells during maturation ([Fig.2c](#)). In tropical legumes like  
71 soybean, ureides are the primary export forms in root nodules from currently fixed nitrogen. It was  
72 reported that ureides are mainly synthesized in UCs and enzymes which are responsible for ureides  
73 biosynthesis present a higher specific activity in the UCs<sup>6,7</sup>. For ureide biogenesis, the uricase and  
74 aspartate aminotransferase genes which expressed in nodules are expressed in all three UC clusters  
75 and especially up-regulated in UC cluster 7 ([Fig.2d](#)). While for ureide transportation, 2 of 3 ureide  
76 permease genes are mainly expressed in UC cluster 0 ([Fig.2d](#)). These results reveal a complex  
77 compartmentalization in UCs during ureide production and transportation in soybean nodules.  
78 Moreover, we found that expression of six of eight beta amylase genes is significantly up-regulated  
79 in cluster 11 ([Fig.2d](#)) and the pathways associated with polysaccharide catabolic process, starch  
80 catabolism are also activated, which indicated that cluster 7 involved in energy supply for  
81 symbiotic nitrogen fixation ([Supplementary Fig.8](#)). Taken together, these results revealed that the  
82 UCs continue to differentiate into functionally specialized sub-cell types during development,  
83 which can facilitate the exchange of nutrient and energy sources required for symbiosis.

84

85 We then focused on infected cells, the core sites of SNF. Consistent with previous reports, some  
86 reported IC-specific genes, such as *GmSYMREM*<sup>8</sup>, *GmN56*<sup>9</sup>, *GmENOD55*<sup>10</sup> are all restricted in  
87 cluster 12 and leghemoglobin genes<sup>11</sup> are up-regulated in cluster 12 ([Supplementary Fig.9](#)). The  
88 gene ontology (GO) analysis of up-regulated genes in ICs showed that the pathways associated  
89 with carbohydrate transmembrane transport and nitrogen-containing amino acid synthesis are  
90 activated, presenting the active carbon and nitrogen exchange between soybean and rhizobia in  
91 ICs ([Supplementary Fig.10](#)). By re-clustering of ICs, we found that they could be further divided  
92 into two sub-cell type (subcluster 12-0 and 12-1) ([Fig.2e](#)). Subcluster 12-0 is shared by nodules at

93 two different developmental stages but the small subcluster 12-1 is almost exclusively occupied  
94 by the 12-dpi immature nodule (Fig.2f). The expression levels of genes encoding symbiosome  
95 membrane protein<sup>12</sup> were much higher in cluster 12-0 than in subcluster 12-1, while there was  
96 almost no difference between subcluster 12-1 and UCs (Fig.2g), indicating a more active  
97 movement of solutes between symbionts in subcluster 12-0 and subcluster 12-1 is a transitional  
98 cell type of ICs during nodule development. We checked subcluster 12-1 specific gene and found  
99 nearly 12% of the genes (6/50) are included in known SNF genes collected by Roy *et al*<sup>1</sup>. This  
100 proportion is significantly higher than cluster 12, 12-0 and all detected clusters (Fig.2h,  
101 Supplemental Fig.11). Besides, 3 of the remaining 44 genes are reported as SNF genes recent  
102 years<sup>13,14</sup> (Fig.2h-i, Supplementary Data 2). We further found that all these 9 SNF genes, including  
103 *SPKI*<sup>15</sup>, *VPY*<sup>16</sup>, *NNLI*<sup>13</sup>, *NPL*<sup>17</sup>, *RINRKI*<sup>18</sup>, *RPG*<sup>19</sup>, *SPL9d*<sup>14</sup>, *CBSI*<sup>20</sup>, are involved in the  
104 formation of infection threads (ITs). ITs take place in root hair after rhizobium attachment and  
105 they assist rhizobium reach and finally release into developing nodules. We analyzed the  
106 expression of 12-1 cluster genes in soybean root hair in the early stage of rhizobial infection (12-  
107 dpi, 24-dpi and 48-dpi) and 60% of these genes (21/35) are expressed only after rhizobia  
108 inoculation<sup>21</sup>(Fig.2j). In contrast, of the cluster 12-0 specific genes, only 2 were induced after  
109 induction. These results imply that cluster 12-1 could involve in ITs extension and the rhizobia  
110 release in ICs during nodule maturation and genes that are specifically expressed in 12-1 may play  
111 a critical role in interaction between soybean and rhizobium in different stages of symbiosis  
112 establishment.

113

114 Overall, we provide a comprehensive cellular atlas by combining single-cell data with spatial  
115 transcriptomic data. Based on this atlas, we identified rare cell subtypes and revealed their distinct

116 roles for nodule maturation and function. To help community to explore the heterogeneity of  
117 different cell types in soybean nodules, we also present a web server (<http://159.138.151.218:3569/>)  
118 to facilitate the use of the datasets generated in this study. In conclusion, we provide a data resource  
119 that will contribute to learning the regulatory network of nodule development at the single cell  
120 level in the future.

121 **Materials and Methods**

122 Please refer to Supplementary material.

123 ***Data Availability***

124 The raw sequencing data generated in this study were deposited in China National Center for  
125 Bioinformatics with accession PRJCA009893 (reviewer link:  
126 <https://ngdc.cncb.ac.cn/gsa/s/1rNqwyk1>).

127

128 ***Acknowledgments***

129 The group of Z.Y. is supported by the Strategic Priority Research Program of the Chinese  
130 Academy of Sciences, Grant No. XDA24010205 and XDA28030101; Agricultural Science and  
131 Technology Innovation Program. The group of J.Z. is supported by the National Key R&D  
132 Program of China Grant (2019YFA0903903); an NSFC to J.Z. (31871234); the Shenzhen Sci-  
133 Tech Fund (KYTDPT20181011104005); the Key Laboratory of Molecular Design for Plant Cell  
134 Factory of Guangdong Higher Education Institutes (2019KSYS006) and the Stable Support Plan  
135 Program of Shenzhen Natural Science Fund Grant (20200925153345004).

136

137 ***Author Contributions***

138 Z.Y. and J.Z. designed the experiments. Z.L., X.K. and Y.L. performed the experiments. Z.L. and  
139 Y.L. analyzed the data. Z.Y., J.Z., Z.L., X.K. and Y.L. wrote the manuscript, L.Q. provided  
140 conceptual insight. H.J. and J.J. edited the article.

141

142 **Competing interests**

143 The authors declare no competing interests.

## 144 **Figure Legends**

145 **Figure 1. Combined spatial transcriptomes and single-nucleus transcriptomes reveal nodule**  
146 **heterogeneity at different developmental stages. a.** Schematic diagram of the integration of  
147 single-nucleus and spatial transcriptomics analysis. **b.** Integration of three single-nucleus datasets.  
148 **c.** UMAP visualization of identified 15 cell clusters in nodules and roots. “\*” indicates that the  
149 cluster is annotated by spatial transcriptome. **d.** Spatial distribution of different cell types in the  
150 bright field picture. Upper left, bright field image of nodule sections used to prepare the spatial  
151 transcriptome. Two replicates are analyzed for both 12-dpi and 21-dpi nodules. Others, spatial  
152 distribution of cell type proportions for each single-nucleus cluster. The colors represent the  
153 fraction of single-nucleus transcriptomes of each cluster deconvolved by destVI. **e.** Validation of  
154 annotation results by GUS-reporter lines.

155  
156 **Figure 2. Dissection central infected zone reveals distinct subtypes of nodule cells. a.** The  
157 distribution of orthologs of UCs and ICs highly expressed genes in *Lotus japonicus* in the UMAP.  
158 Expression levels of gene sets are measured by AUC score. **b.** Bar chart representing the  
159 percentage of cells from different samples in each UC clusters. N indicates the cell number. **c.**  
160 Developmental trajectories of UCs inferred using cellrank and cytortrace. Colors represent different  
161 IC clusters (0, 7, 11). **d.** Dotplot representing the expression pattern of representative up-regulated  
162 genes for each UC cluster. **e.** UMAP visualization of identified IC subclusters. **f.** Bar chart  
163 representing the percentage of cells from different samples in each sub-cell type. N indicates the  
164 cell number. **g.** AUC score of genes encoding symbiosis membrane protein. The p-values are  
165 calculated by the Mood’s median test. The p-values between 12-1 and the remaining three UC  
166 clusters are greater than 0.05. **h.** Percentage of known symbiotic nitrogen fixation genes collected



167 by Roy *et al.* in different cell-type-specific gene sets. The calculation of the P-value is detailed in  
168 Supplementary Fig.11. N indicates the gene number. **i.** Dotplot representing the expression pattern  
169 of 12-1-specific known symbiotic nitrogen fixation genes. **j.** Heatmap representing expression  
170 pattern of detected specific genes for subcluster 12-0 and 12-1 in inoculated and mock-inoculated  
171 root hair datasets.

172

173

## 174 **References**

- 175 1 Roy, S. *et al.* Celebrating 20 years of genetic discoveries in legume nodulation and  
176 symbiotic nitrogen fixation. *The Plant Cell* **32**, 15-41 (2020).
- 177 2 Lopez, R., Regier, J., Cole, M. B., Jordan, M. I. & Yosef, N. Deep generative modeling  
178 for single-cell transcriptomics. *Nature Methods* **15**, 1053-1058 (2018).
- 179 3 Shahan, R. *et al.* A single-cell Arabidopsis root atlas reveals developmental trajectories in  
180 wild-type and cell identity mutants. *Developmental Cell* **57**, 543-560. e549 (2022).
- 181 4 Xia, K. *et al.* The single-cell stereo-seq reveals region-specific cell subtypes and  
182 transcriptome profiling in Arabidopsis leaves. *Developmental Cell* **57**, 1299-1310. e1294  
183 (2022).
- 184 5 Wang, L. *et al.* Single cell-type transcriptome profiling reveals genes that promote  
185 nitrogen fixation in the infected and uninfected cells of legume nodules. *Plant*  
186 *Biotechnology Journal* **20**, 616-618 (2022).
- 187 6 Newcomb, E. H. & Tandon, S. R. Uninfected cells of soybean root nodules: ultrastructure  
188 suggests key role in ureide production. *Science* **212**, 1394-1396 (1981).
- 189 7 Hanks, J. F., Schubert, K. & Tolbert, N. Isolation and characterization of infected and  
190 uninfected cells from soybean nodules: role of uninfected cells in ureide synthesis. *Plant*  
191 *Physiology* **71**, 869-873 (1983).
- 192 8 Fan, W. *et al.* Rhizobial infection of 4C cells triggers their endoreduplication during  
193 symbiotic nodule development in soybean. *New Phytologist* **234**, 1018-1030 (2022).
- 194 9 Kouchi, H. & Hata, S. GmN56, a novel nodule-specific cDNA from soybean root nodules  
195 encodes a protein homologous to isopropylmalate synthase and homocitrate synthase.  
196 *Molecular Plant-microbe Interactions: MPMI* **8**, 172-176 (1995).
- 197 10 de Blank, C. *et al.* Characterization of the soybean early nodulin cDNA clone  
198 GmENOD55. *Plant Molecular Biology* **22**, 1167-1171 (1993).
- 199 11 Appleby, C. A. Leghemoglobin and Rhizobium respiration. *Annual Review of Plant*  
200 *Physiology* **35**, 443-478 (1984).
- 201 12 Luo, Y., Liu, W., Sun, J., Zhang, Z.-R. & Yang, W.-C. Quantitative proteomics reveals  
202 key pathways in the symbiotic interface and the likely extracellular property of soybean  
203 symbiosome. *Journal of Genetics and Genomics* (2022).
- 204 13 Zhang, B. *et al.* Glycine max NNL1 restricts symbiotic compatibility with widely  
205 distributed bradyrhizobia via root hair infection. *Nature Plants* **7**, 73-86 (2021).
- 206 14 Yun, J. *et al.* The miR156b - GmSPL9d module modulates nodulation by targeting  
207 multiple core nodulation genes in soybean. *New Phytologist* **233**, 1881-1899 (2022).
- 208 15 Liu, J., Liu, M. X., Qiu, L. P. & Xie, F. SPIKE1 activates the GTPase ROP6 to guide the  
209 polarized growth of infection threads in *Lotus japonicus*. *The Plant Cell* **32**, 3774-3791  
210 (2020).

- 211 16 Murray, J. D. *et al.* Vapyrin, a gene essential for intracellular progression of arbuscular  
212 mycorrhizal symbiosis, is also essential for infection by rhizobia in the nodule symbiosis  
213 of *Medicago truncatula*. *The Plant Journal* **65**, 244-252 (2011).
- 214 17 Xie, F. *et al.* Legume pectate lyase required for root infection by rhizobia. *Proceedings of*  
215 *the National Academy of Sciences* **109**, 633-638 (2012).
- 216 18 Li, X. *et al.* Atypical receptor kinase RINRK1 required for rhizobial infection but not  
217 nodule development in *Lotus japonicus*. *Plant Physiology* **181**, 804-816 (2019).
- 218 19 Arrighi, J.-F. *et al.* The RPG gene of *Medicago truncatula* controls *Rhizobium*-directed  
219 polar growth during infection. *Proceedings of the National Academy of Sciences* **105**,  
220 9817-9822 (2008).
- 221 20 Sinharoy, S. *et al.* A *Medicago truncatula* cystathionine- $\beta$ -synthase-like domain-  
222 containing protein is required for rhizobial infection and symbiotic nitrogen fixation.  
223 *Plant Physiology* **170**, 2204-2217 (2016).
- 224 21 Libault, M. *et al.* Complete transcriptome of the soybean root hair cell, a single-cell  
225 model, and its alteration in response to *Bradyrhizobium japonicum* infection. *Plant*  
226 *Physiology* **152**, 541-552 (2010).
- 227

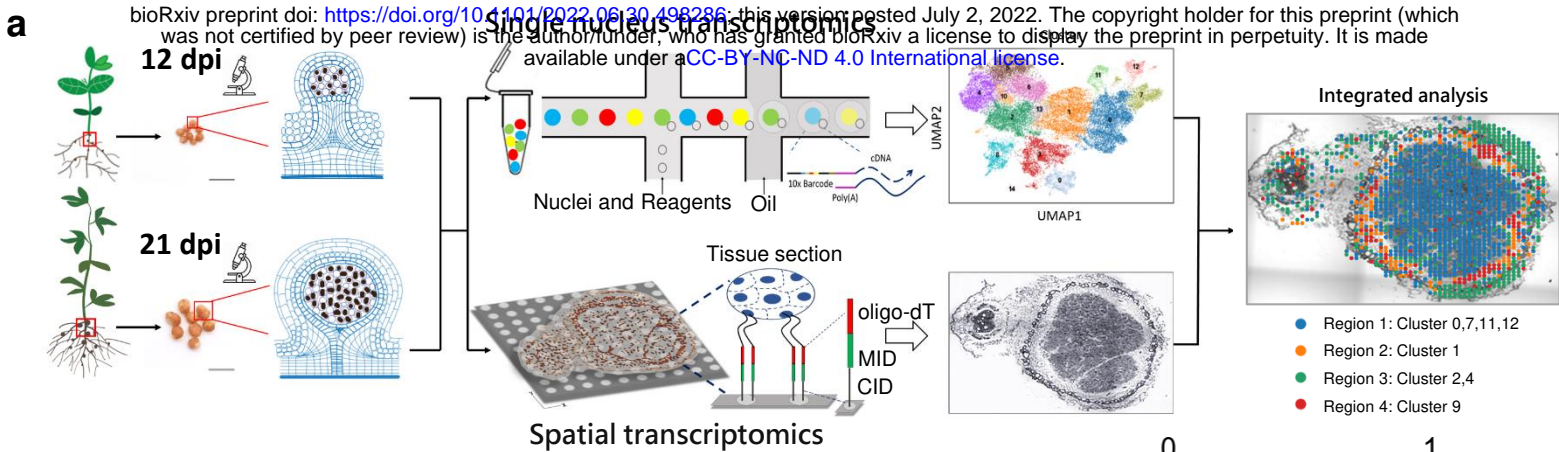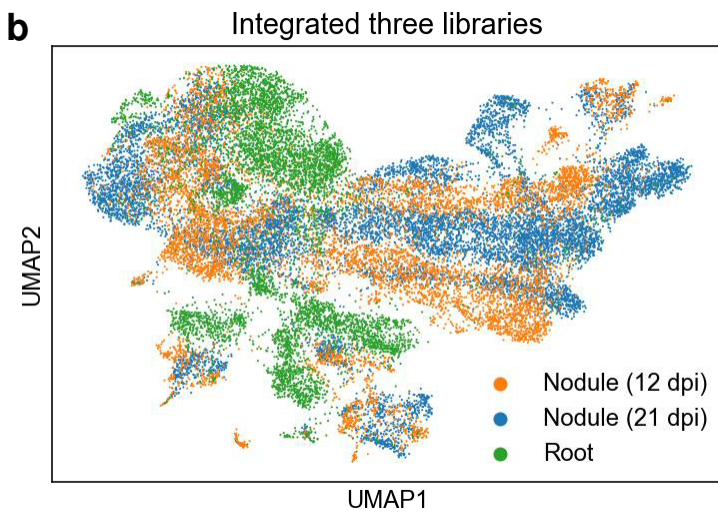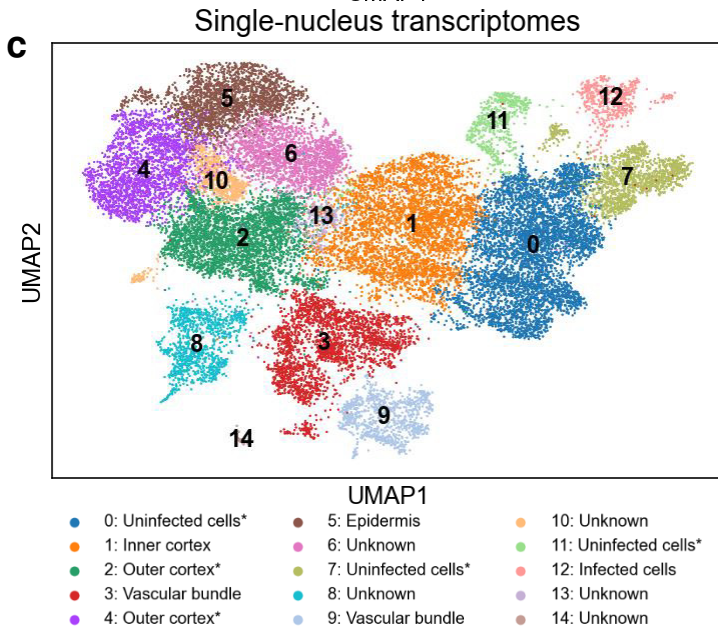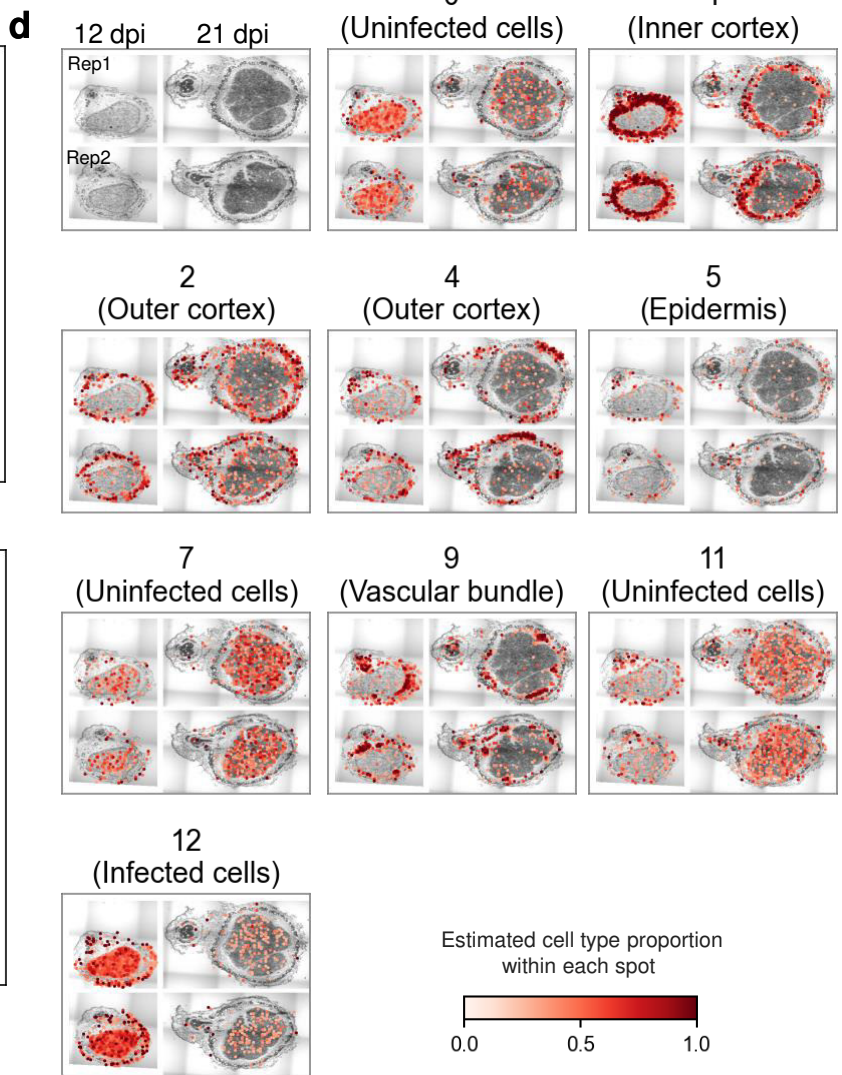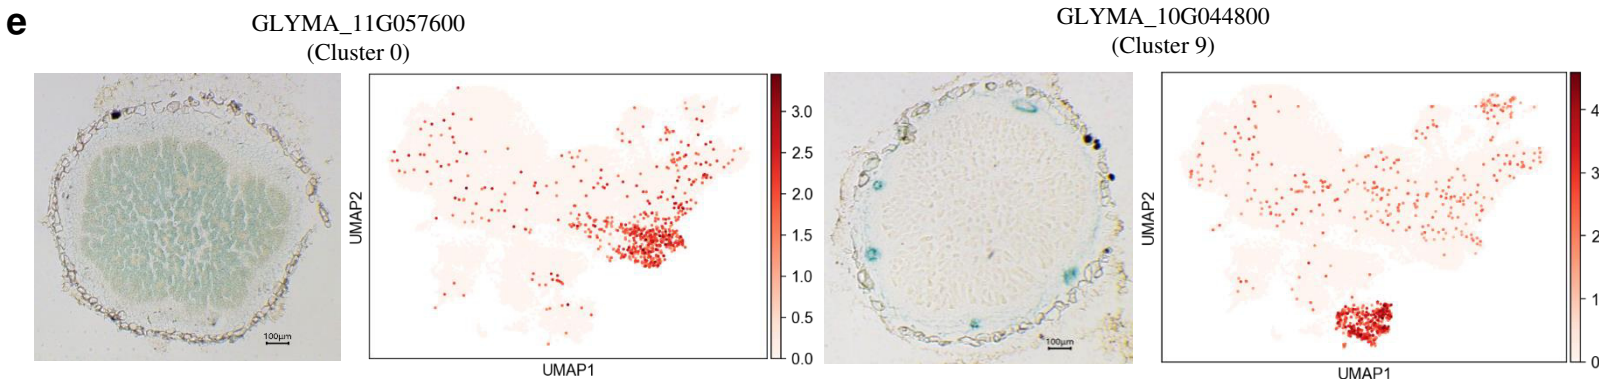

**Figure 1. Combined spatial transcriptomes and single-nucleus transcriptomes reveal nodule heterogeneity at different developmental stages.** **a.** Schematic diagram of the integration of single-nucleus and spatial transcriptomics analysis. **b.** Integration of three single-nucleus datasets. **c.** UMAP visualization of identified 15 cell clusters in nodules and roots. “\*” indicates that the cluster is annotated by spatial transcriptome. **d.** Spatial distribution of different cell types in the bright field picture. Upper left, bright field image of nodule sections used to prepare the spatial transcriptome. Two replicates are analyzed for both 12-dpi and 21-dpi nodules. Others, spatial distribution of cell type proportions for each single-nucleus cluster. The colors represent the fraction of single-nucleus transcriptomes of each cluster deconvolved by destVI. **e.** Validation of annotation results by GUS-reporter lines.

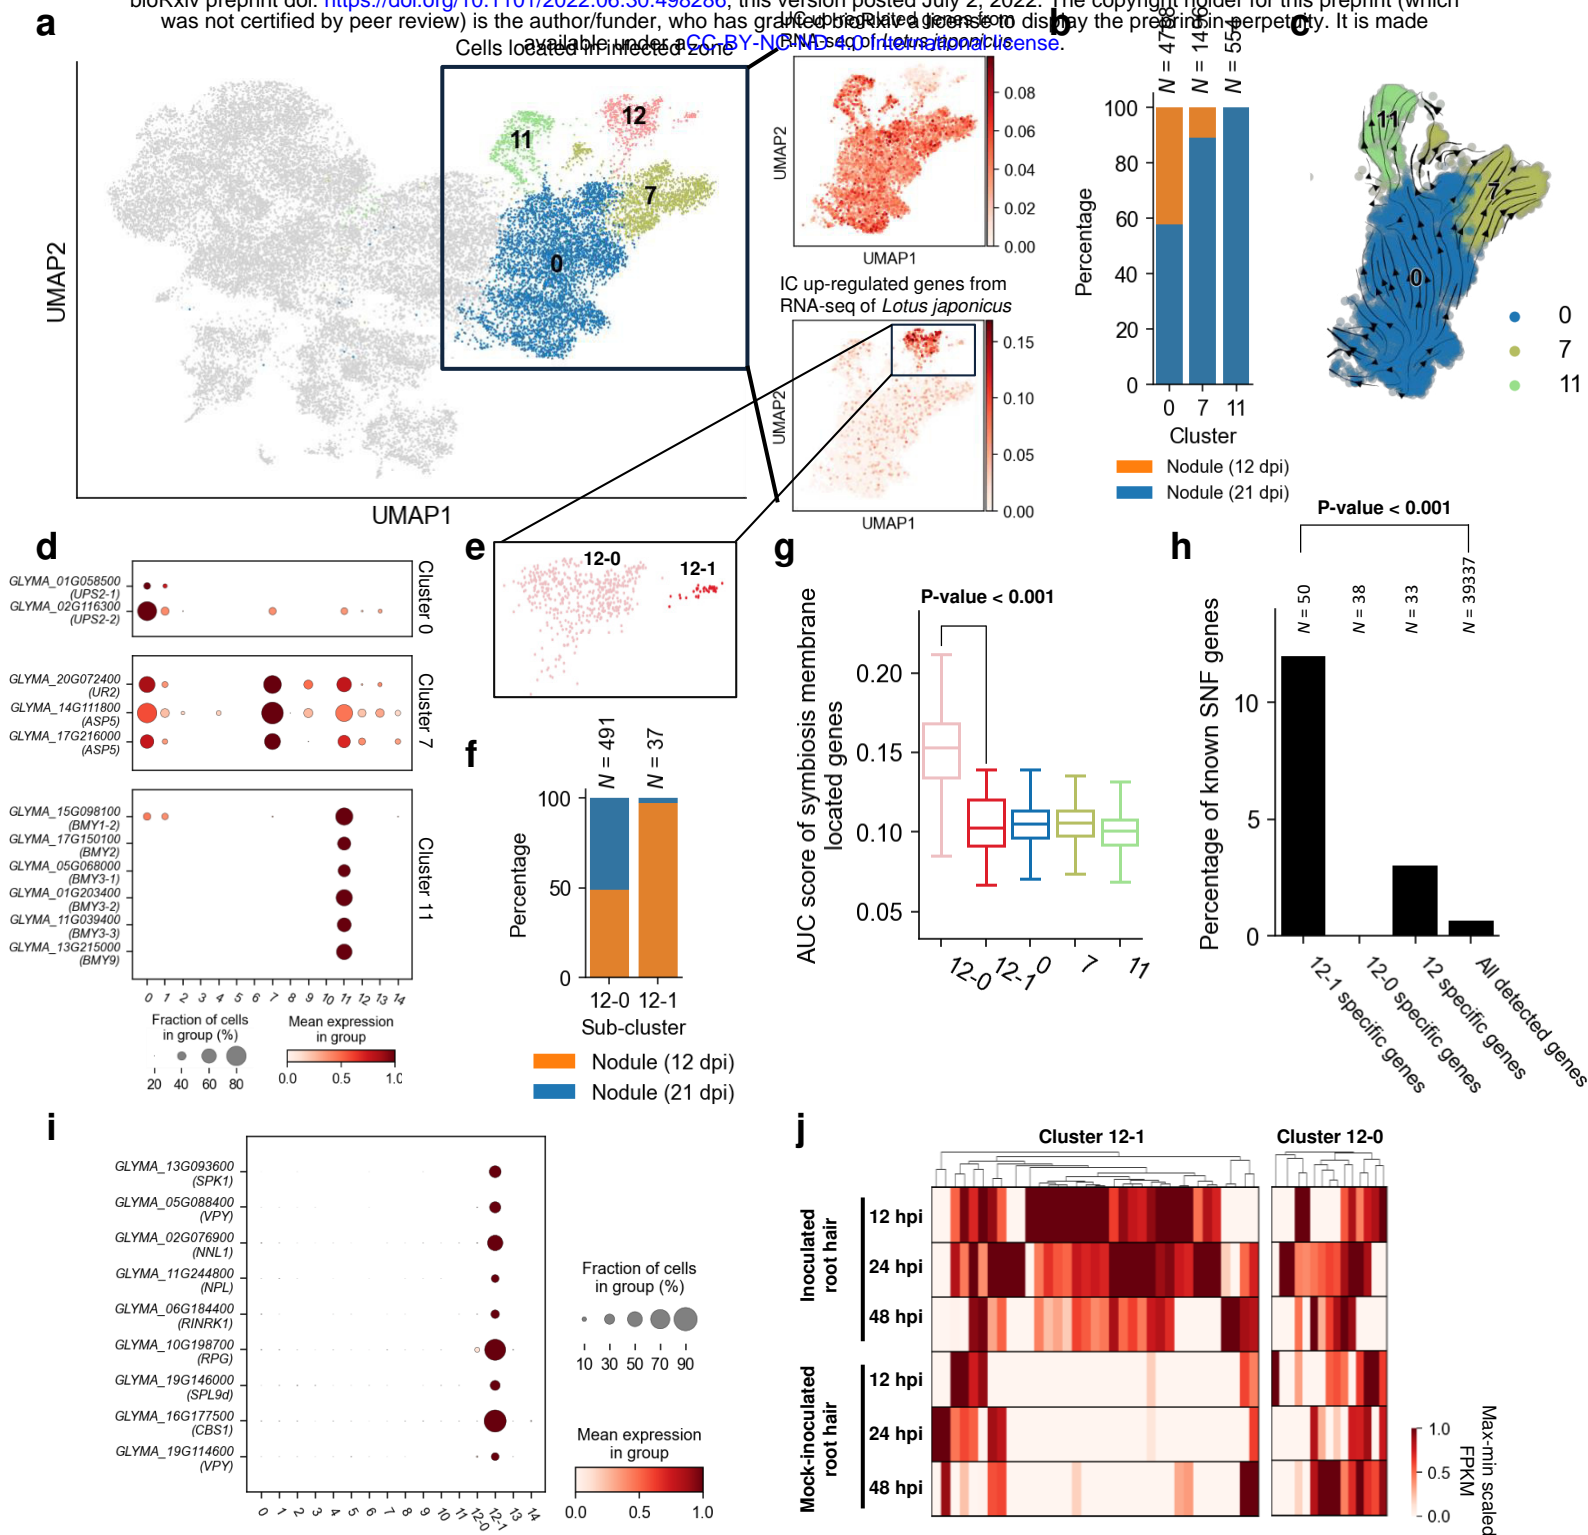

**Figure 2. Dissection central infected zone reveals distinct subtypes of nodule cells.** **a.** The distribution of orthologs of UCs and ICs highly expressed genes in *Lotus japonicus* in the UMAP. Expression levels of gene sets are measured by AUC score. **b.** Bar chart representing the percentage of cells from different samples in each UC clusters. N indicates the cell number. **c.** Developmental trajectories of UCs inferred using cellrank and cytotrace. Colors represent different IC clusters (0, 7, 11). **d.** Dotplot representing the expression pattern of representative up-regulated genes for each UC cluster. **e.** UMAP visualization of identified IC subclusters. **f.** Bar chart representing the percentage of cells from different samples in each sub-cell type. N indicates the cell number. **g.** AUC score of genes encoding symbiosis membrane protein. The p-values are calculated by the Mood's median test. The p-values between 12-1 and the remaining three UC clusters are greater than 0.05. **h.** Percentage of known symbiotic nitrogen fixation genes collected by Roy *et al.* in different cell-type-specific gene sets. The calculation of the P-value is detailed in Supplementary Fig. 11. N indicates the gene number. **i.** Dotplot representing the expression pattern of 12-1-specific known symbiotic nitrogen fixation genes. **j.** Heatmap representing expression pattern of detected specific genes for subcluster 12-0 and 12-1 in inoculated and mock-inoculated root hair datasets.
